# Supplementary material for: Acridine-based dyes as high-performance near-infrared Raman reporter molecules for cell imaging
Source: Royal Society of Chemistry journal article supplement (doi:10.1039/d1ra08827k), 2022-01-01
Supplement: d1ra08827k1.pdf [file d1ra08827k1.pdf]

## Supporting Information

### Acridine-based near-infrared dyes as high-performanced Raman reporter molecules for cancer cell imaging

Jiasheng Du, Jinming Li, Dong Wang, Hui Cao, Wanli He, Yuzhan Li, Yang Zhou\*

Department of Materials Physics and Chemistry, School of Materials Science and Engineering, University of Science and Technology Beijing, Beijing 100083, China

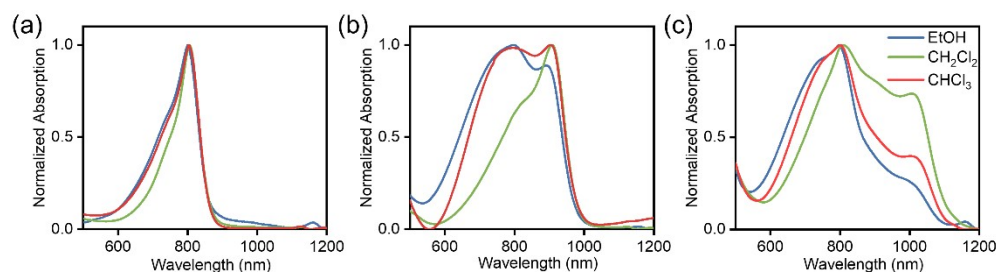

Figure S1 UV-Vis absorption spectra of (a) C3AD, (b) C5AD, and (c) C7AD in EtOH (blue) , CH<sub>2</sub>Cl<sub>2</sub> (green) and CHCl<sub>3</sub> (red) .

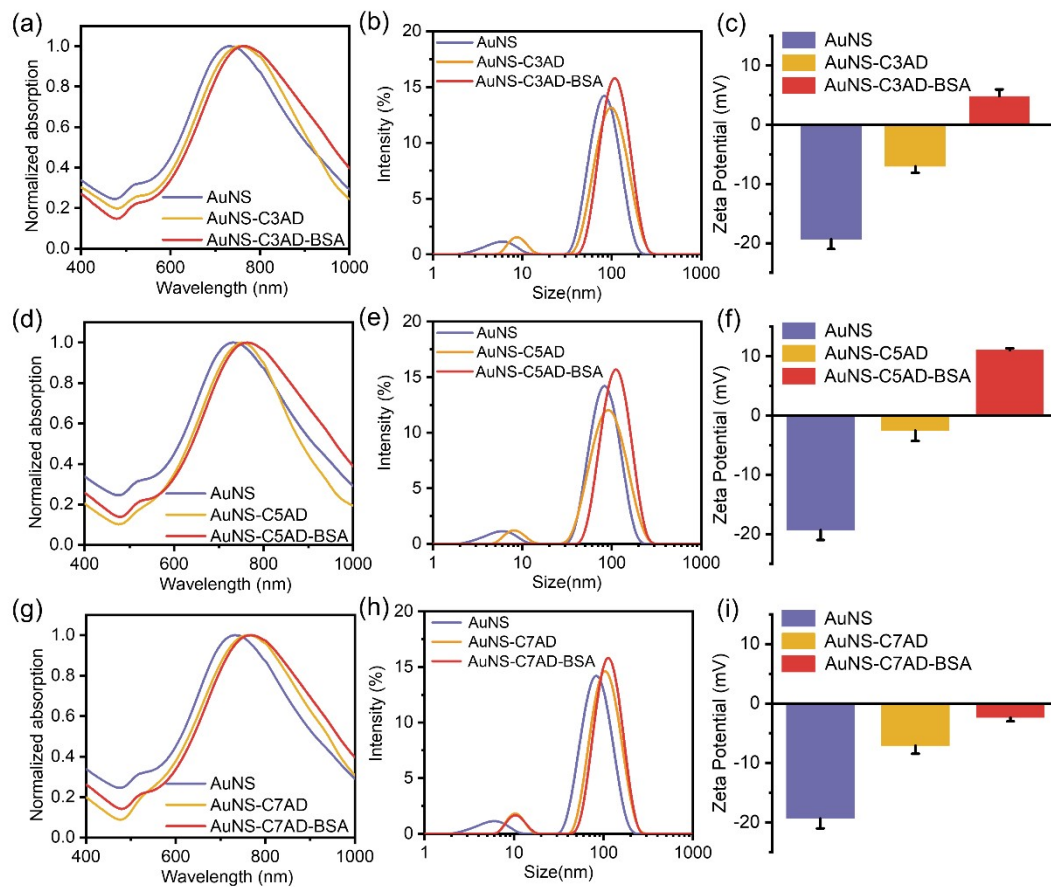

Figure S2 UV-Vis absorption spectra, hydrodynamic diameter distributions and average zeta potential of (a-c) C3AD (d-f) C5AD and (g-i) C7AD nanotags.

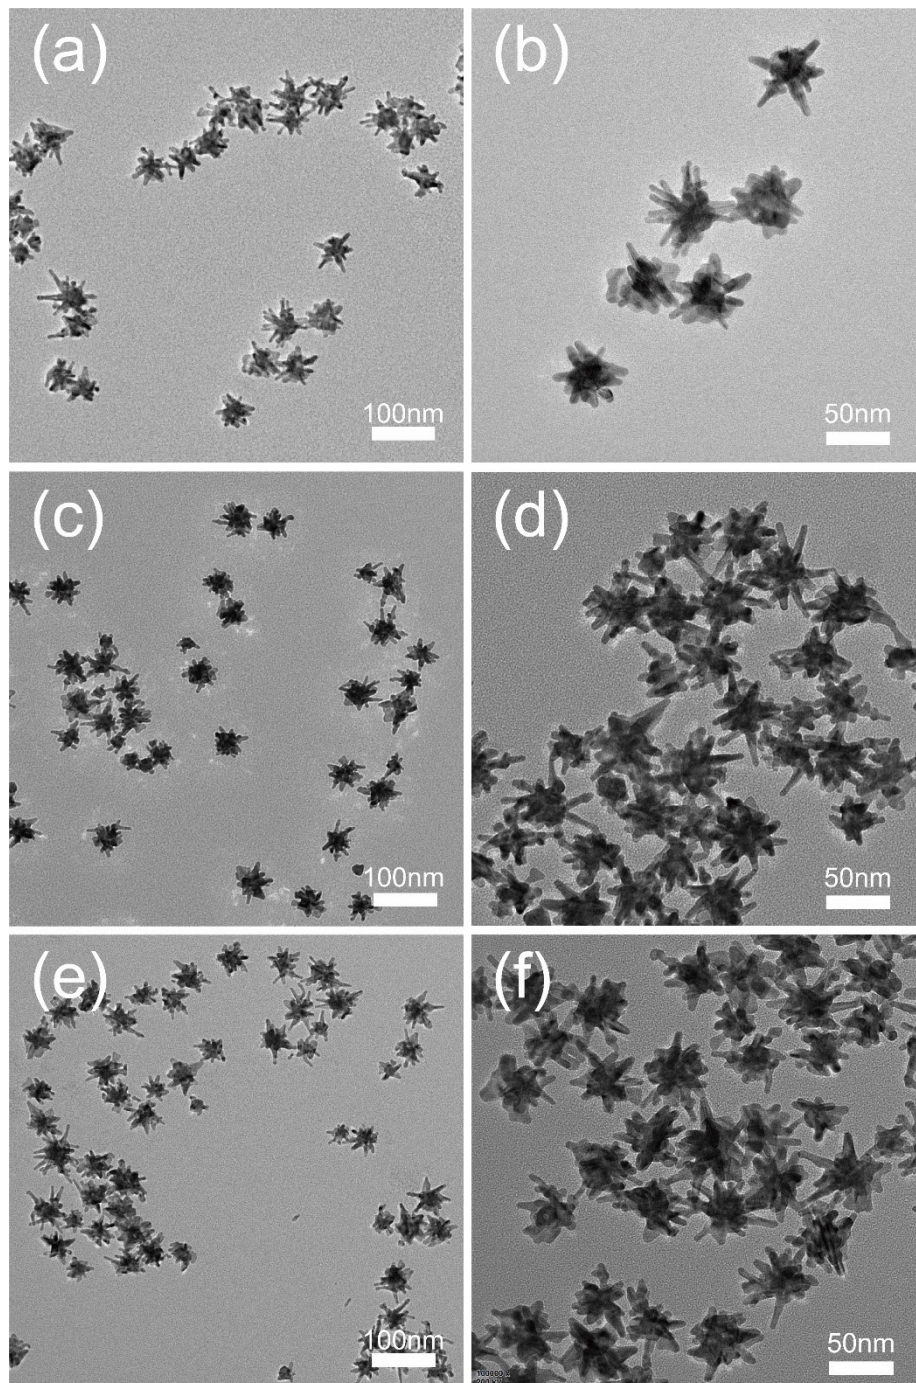

Figure S3 TEM images of (a,b) AuNS-C3AD-BSA, (c,d) AuNS-C5AD-BSA and (e,f) AuNS-C7AD-BSA.

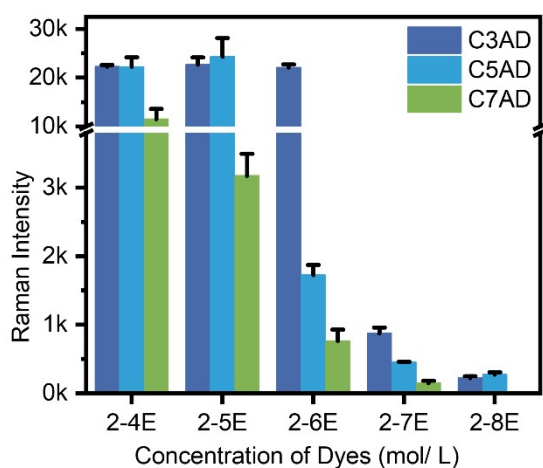

Figure S4 The relationship between the concentration of AD dyes and SERS intensity of  $1277\text{ cm}^{-1}$  SERS band. (n=3) (785 nm wavelength, 0.85 mW laser power, 10 s exposure time and 50L× objective lens.)

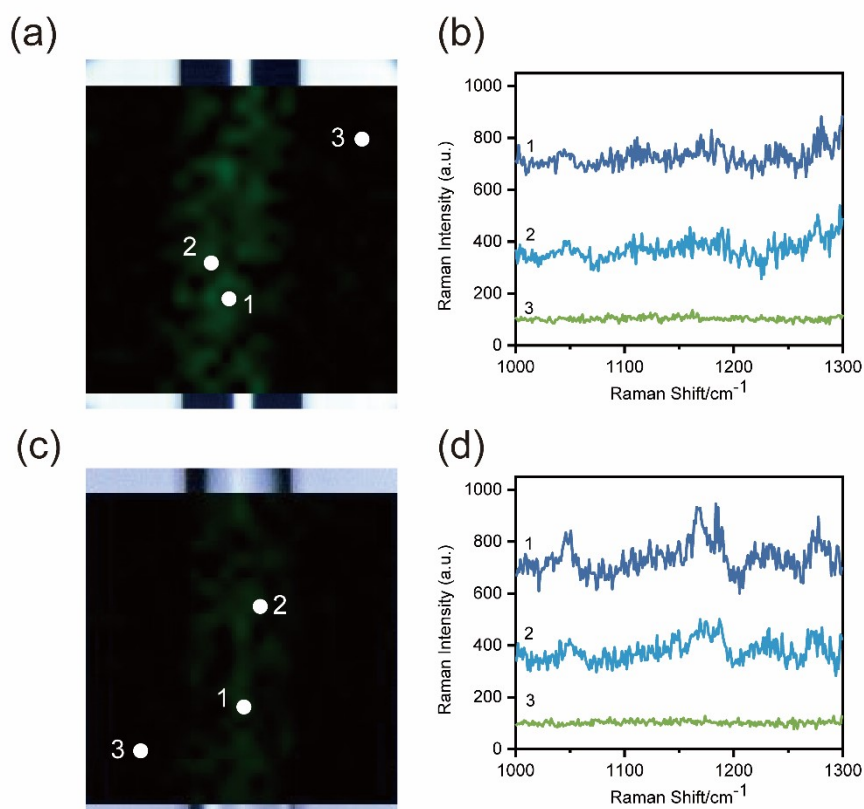

Figure S5 SERS images of (a) AuNS-C3AD-BSA and (c) AuNS-C7AD-BSA and (b and d) the corresponding SERS spectra of  $16.2\text{ pM}$  inside the vessel (positions 1 and 2) and outside the vessel (position 3).

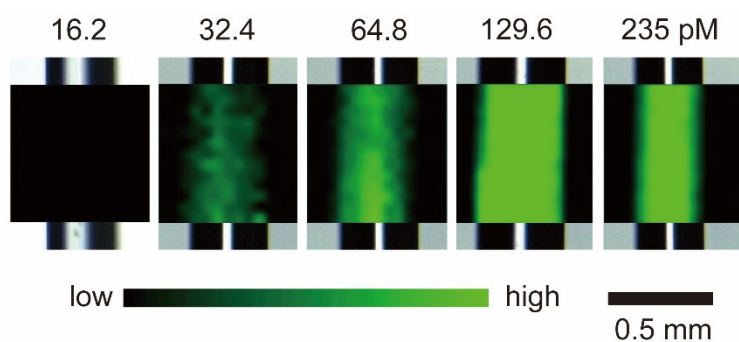

Figure S6 SERS images of AuNS-DTTC-BSA. The SERS images were acquired under a 5 $\times$  objective lens with 1.7 mW laser power on the samples, 2 s exposure time and 50  $\mu$ m step size. The SERS images were created with the intensity of 1239  $\text{cm}^{-1}$  SERS band after removing the baseline via Wire 5.1.

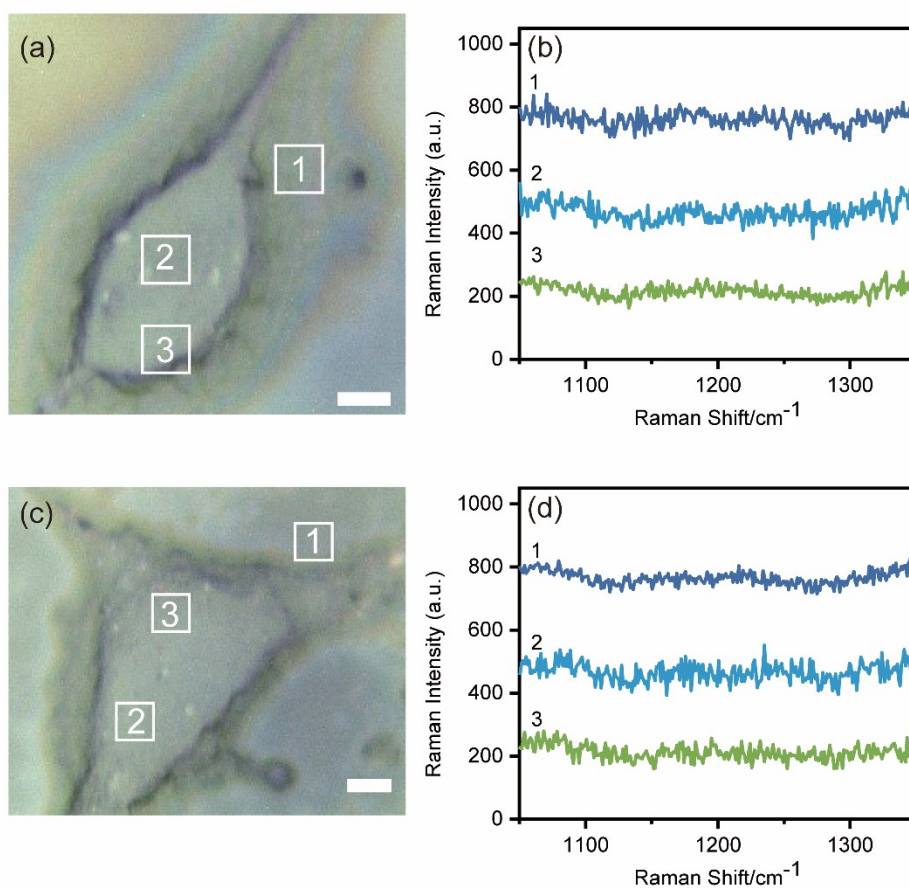

Figure S7 (a) and (c) are bright field image of A549. (b) and (d) are corresponding SERS spectra of position 1, 2, and 3. The SERS imaging was carried out using a 100 $\times$  objective lens at 8.5 mW laser power with 5 s exposure time and 5  $\mu$ m step size. Scale bar : 5  $\mu$ m.

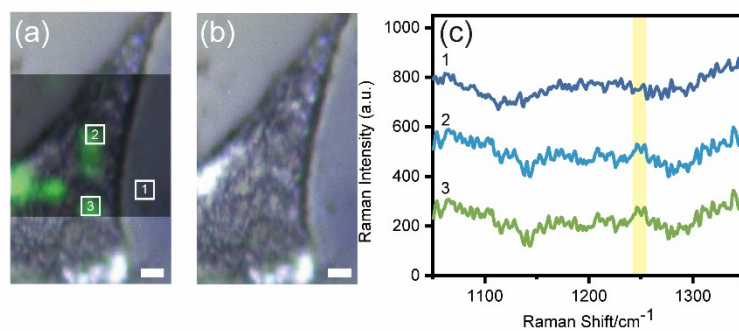

Figure S8 (c) SERS spectra of position 1, 2, and 3 in (a) overlay of bright field image and (b) bright field image of A549 cell. The SERS imaging was carried out using a 100× objective lens at 8.5 mW laser power with 5 s exposure time and 3 μm step size. Scale bar : 5 μm.

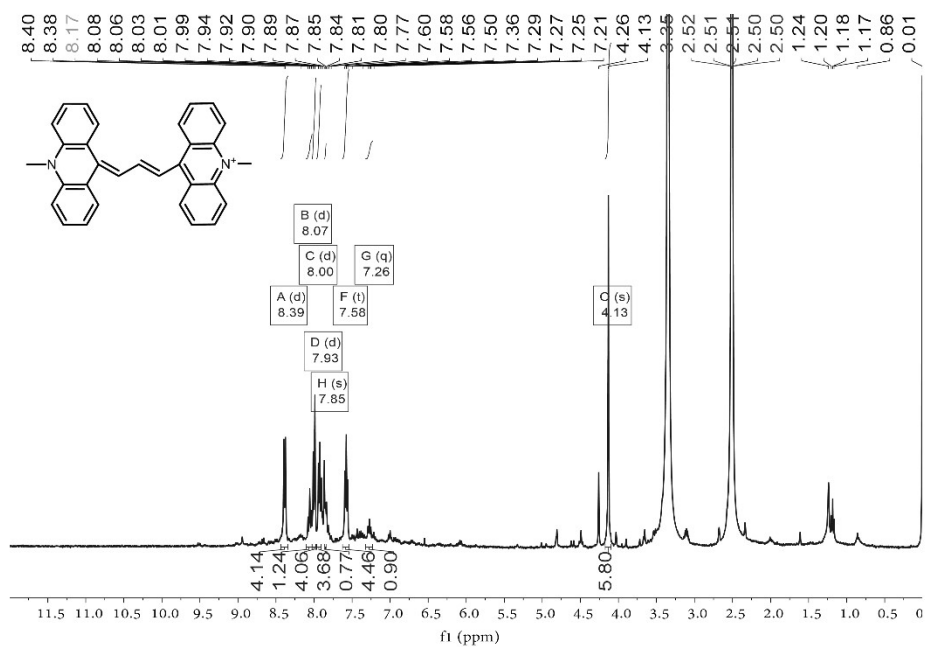

Figure S9 <sup>1</sup>H NMR spectra of C3AD

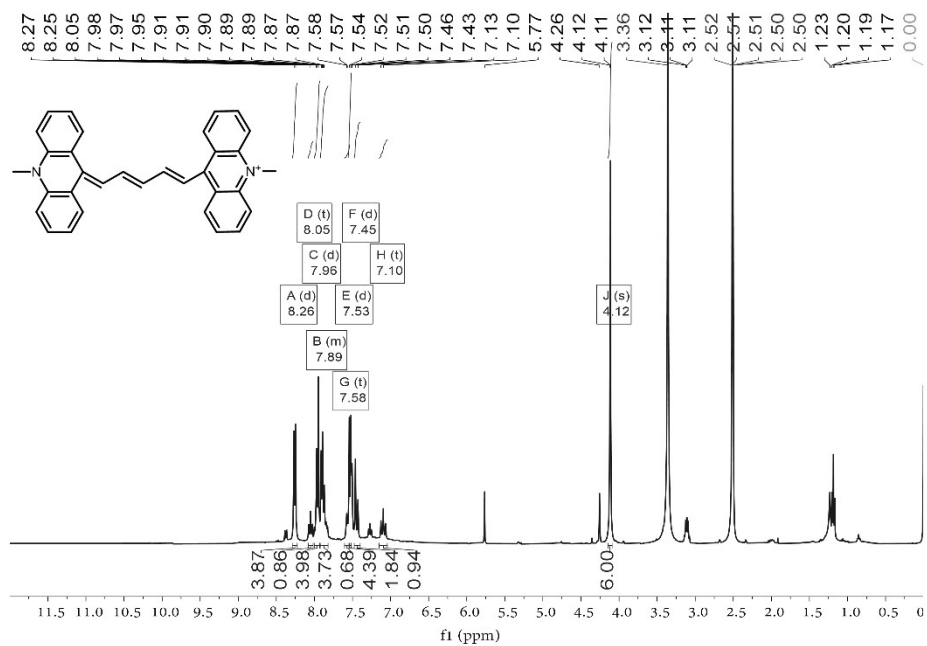

Figure S10 <sup>1</sup>H NMR spectra of C5AD

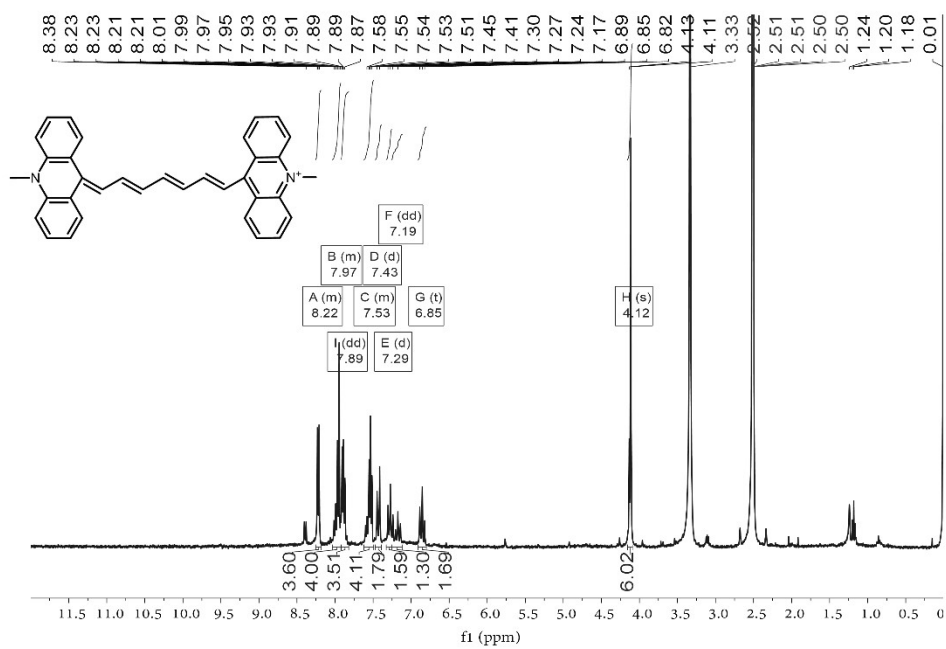

Figure S11 <sup>1</sup>H NMR spectra of C7AD

Table S1

| Nanostructures                       | Molecular probe                                                                                           | Detection Limit                               | Reference |
|--------------------------------------|-----------------------------------------------------------------------------------------------------------|-----------------------------------------------|-----------|
| gold nanostar                        | 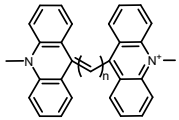<br>AD dyes (n=3, 5, 7)  | 0.4 pM (n=3)<br>0.5 pM (n=5)<br>0.51 pM (n=7) | This Work |
| gold particles<br>(60 nm)            | <br>Malachite Green      | 2.3 μM                                        | 1         |
| gold nanoparticle<br>(40 nm)         | <br>P4                   | 0.26 nM                                       | 2         |
| gold nanostar                        | <br>IR7p                | 0.8 pM                                        | 3         |
| Au NSs                               | <br>4-NTP              | 0.13 pM                                       | 4         |
| Hollow AgAu                          | <br>DTTC               | 1 pM                                          | 5         |
| hollow CuS NPs                       | DTTC                                                                                                      | 1 pM                                          | 6         |
| gold particles<br>(60 nm)            | <br>IR729              | 1 fM                                          | 7         |
|                                      | <br>3                  | 100 aM,                                       |           |
| Gap-enhanced<br>Raman tags<br>(GERT) | <br>1,4-Benzenedithiol | 0.1 pM                                        | 8         |



## References

1. X. Qian, S. R. Emory and S. Nie, *J. Am. Chem. Soc.*, 2012, **134**, 2000-2003.
2. R. Javaid, N. Sayyadi, K. Mylvaganam, K. Venkatesan, Y. Wang and A. Rodger, *J. Raman Spectrosc.*, 2020, **51**, 2408-2415.
3. W. Duan, Q. Yue, Y. Liu, Y. Zhang, Q. Guo, C. Wang, S. Yin, D. Fan, W. Xu, J. Zhuang, J. Gong, X. Li, R. Huang, L. Chen, S. Aime, Z. Wang, J. Feng, Y. Mao, X. Y. Zhang and C. Li, *Chemical Science* 2020, **11**, 4397-4402.
4. Y. Wen, V. X. Truong and M. Li, *Nano Lett.*, 2021, **21**, 3066-3074.
5. J. He, Q. Wei, S. Wang, S. Hua and M. Zhou, *Biomaterials*, 2021, **271**, 120734.
6. Y. Qiu, M. Lin, G. Chen, C. Fan, M. Li, X. Gu, S. Cong, Z. Zhao, L. Fu, X. Fang and Z. Xiao, *ACS Appl. Mater. Interfaces*, 2019, **11**, 23436-23444.
7. S. Harmsen, M. A. Bedics, M. A. Wall, R. Huang, M. R. Detty and M. F. Kircher, *Nat. Commun.*, 2015, **6**, 6570.
8. Z. Bao, Y. Zhang, Z. Tan, X. Yin, W. Di and J. Ye, *Biomaterials*, 2018, **163**, 105-115.
